# Supplementary material for: Contemporary epidemiology of rising atrial septal defect trends across USA 1991–2016: a combined ecological geospatiotemporal and causal inferential study
Source: Springer Nature journal article supplement (doi:10.1186/s12887-020-02431-z), 2020-11-30

# Log (ASD Rate) by State – Raw Data Plot

Data: NBDPN Annual Reports

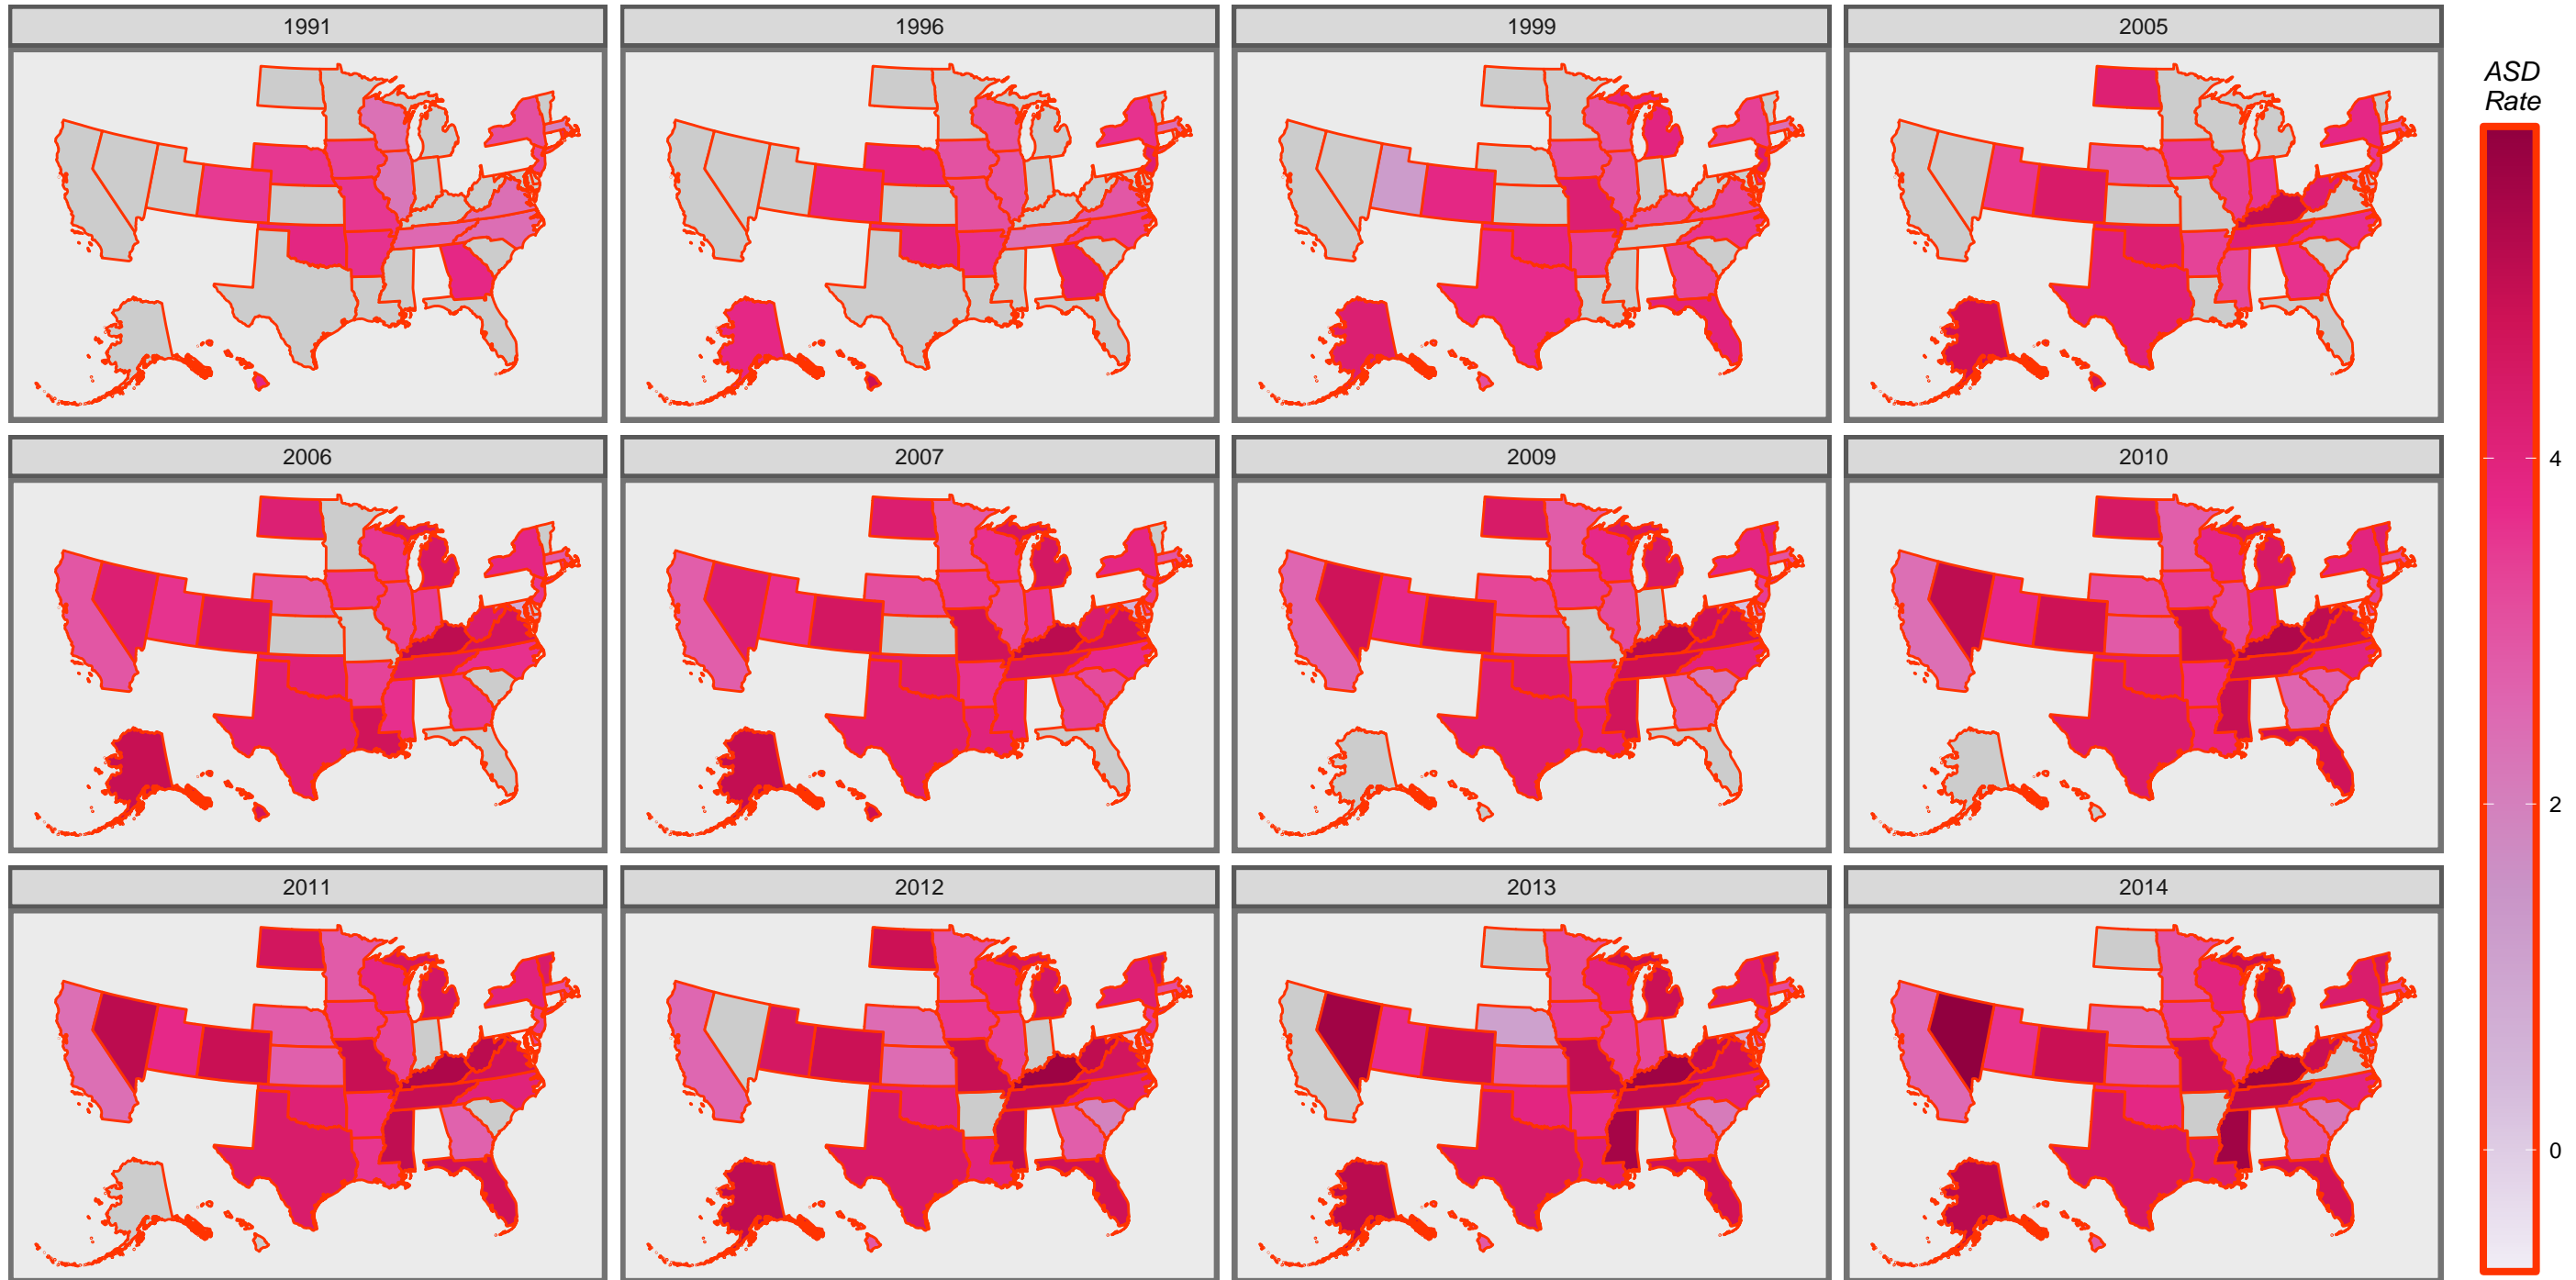

Supplement: MOESM2 [file 18641836]
