# Supplementary material for: Contemporary epidemiology of rising atrial septal defect trends across USA 1991–2016: a combined ecological geospatiotemporal and causal inferential study
Source: Springer Nature journal article supplement (doi:10.1186/s12887-020-02431-z), 2020-11-30

**Log (ASD Rate) by Quintiles  
– All Data**

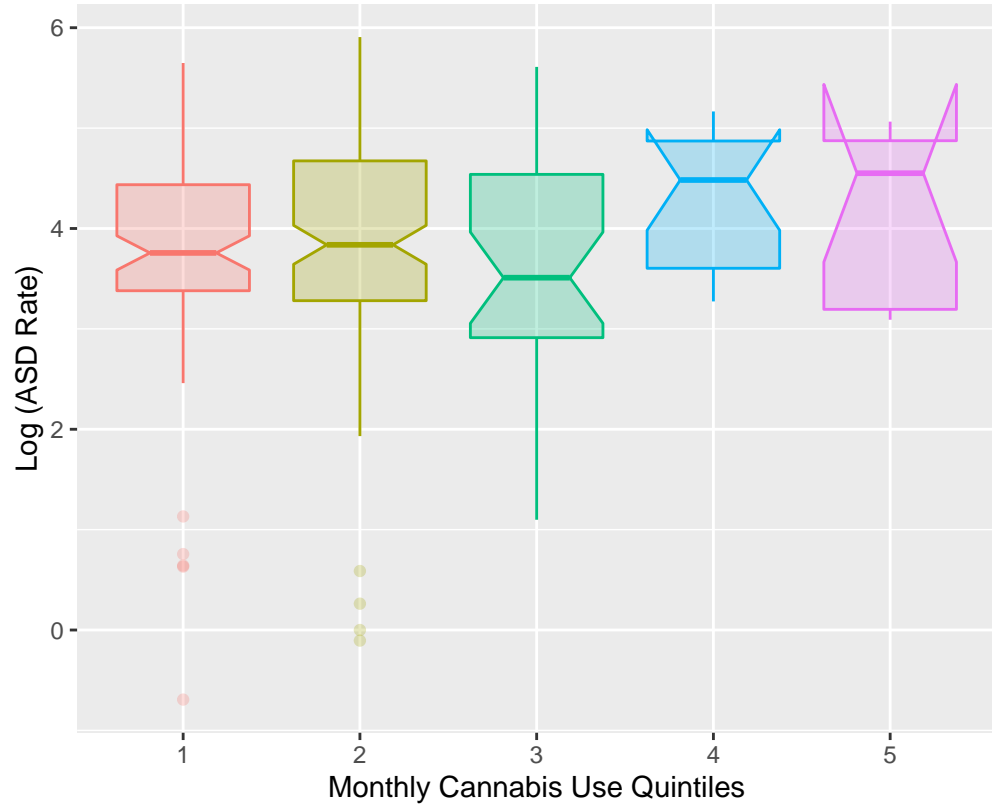

**Log (ASD Rate) by Quintiles 1, 2 & 3 Vs. Quintiles 4 & 5  
– All Data**

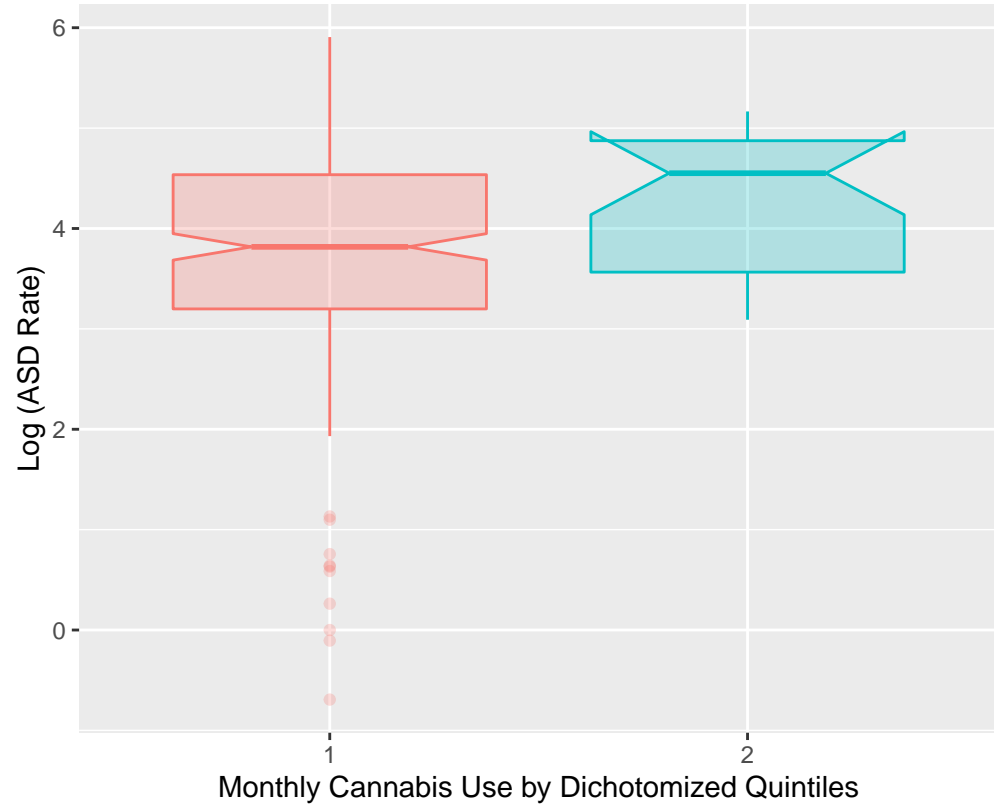

Supplement: MOESM3 [file 18641836]
