# Supplementary material for: Contemporary epidemiology of rising atrial septal defect trends across USA 1991–2016: a combined ecological geospatiotemporal and causal inferential study
Source: Springer Nature journal article supplement (doi:10.1186/s12887-020-02431-z), 2020-11-30

# ASD Rate by State by Cannabinoid Exposure – Regression Lines

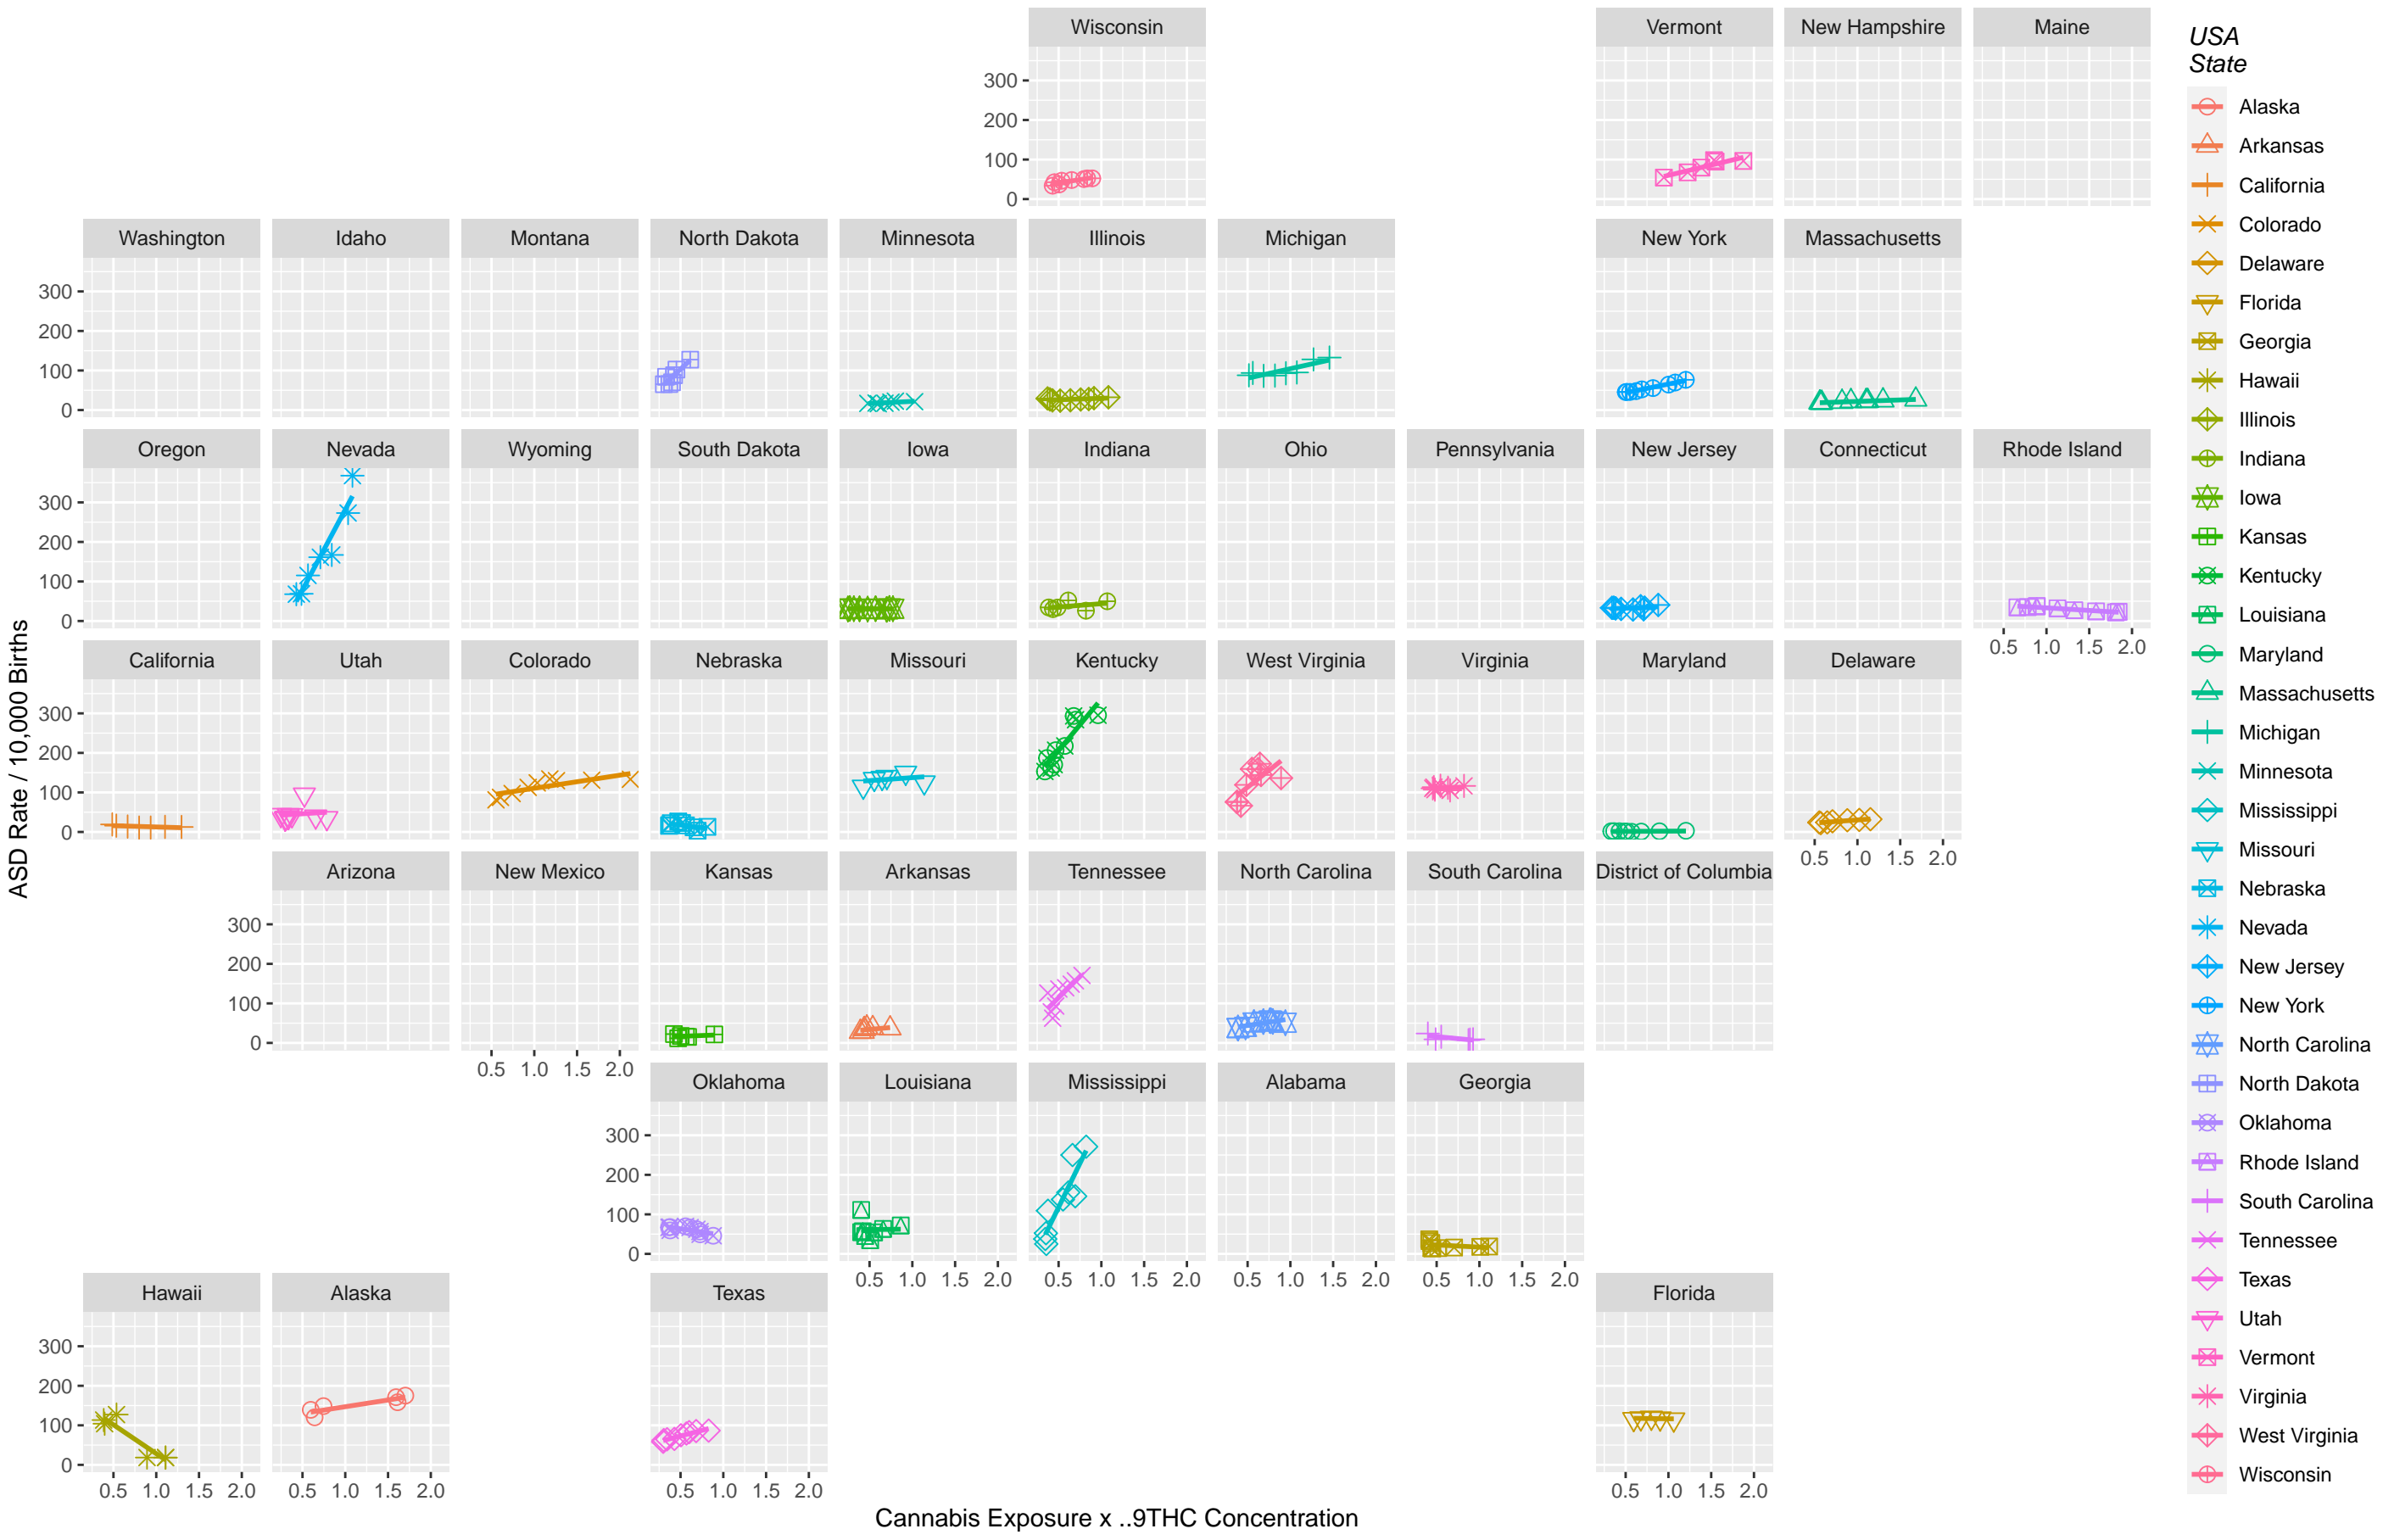

Supplement: MOESM5 [file 18641836]
