# Supplementary material for: Contemporary epidemiology of rising atrial septal defect trends across USA 1991–2016: a combined ecological geospatiotemporal and causal inferential study
Source: Springer Nature journal article supplement (doi:10.1186/s12887-020-02431-z), 2020-11-30
Supplement: MOESM6 [file 18641836]

# Cannabis / Cannabinoid Exposure by Year

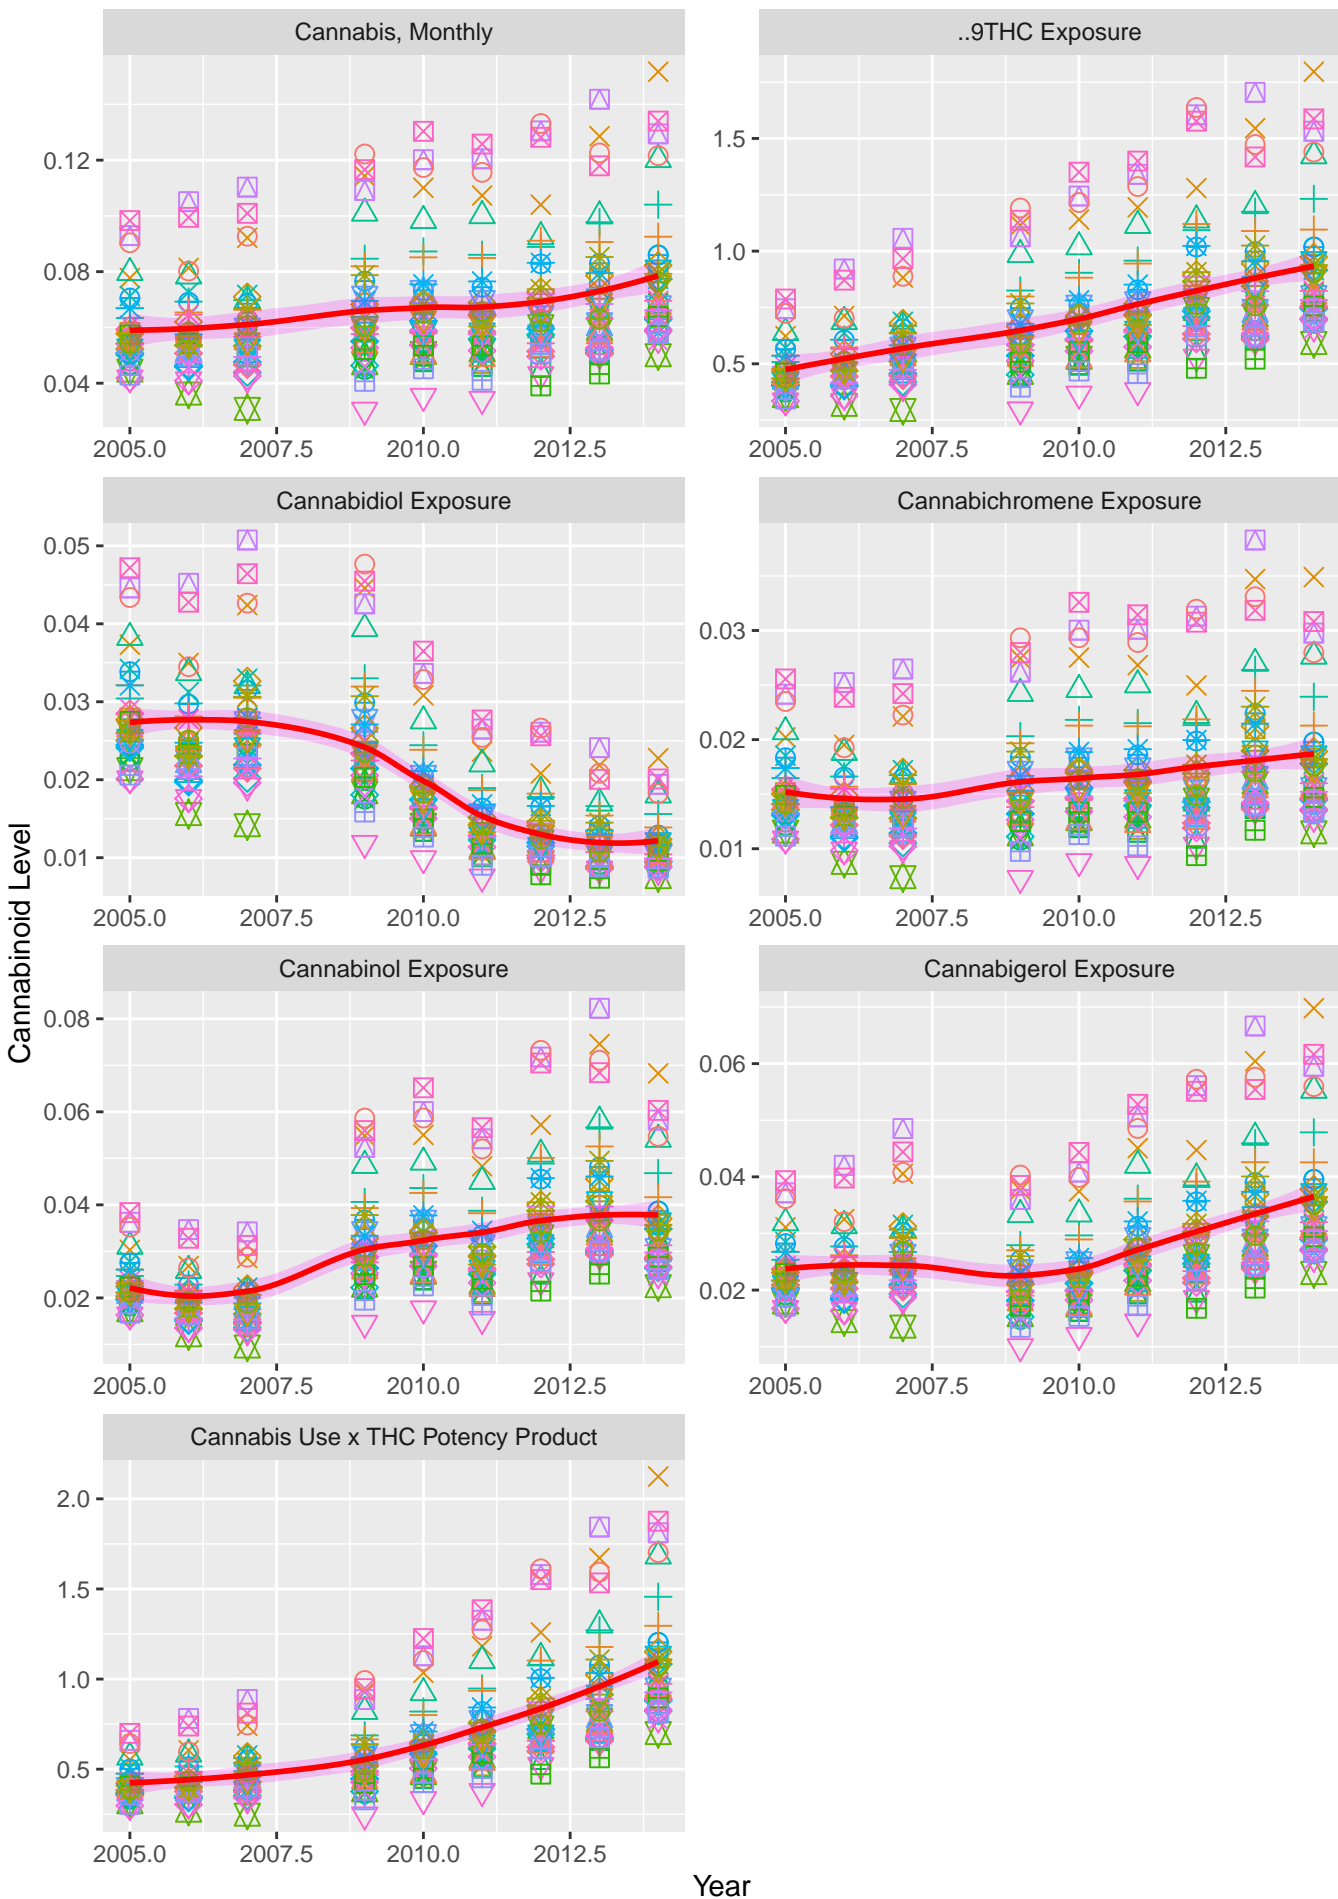

# ASD Rate by Cannabidiol Exposure by Year

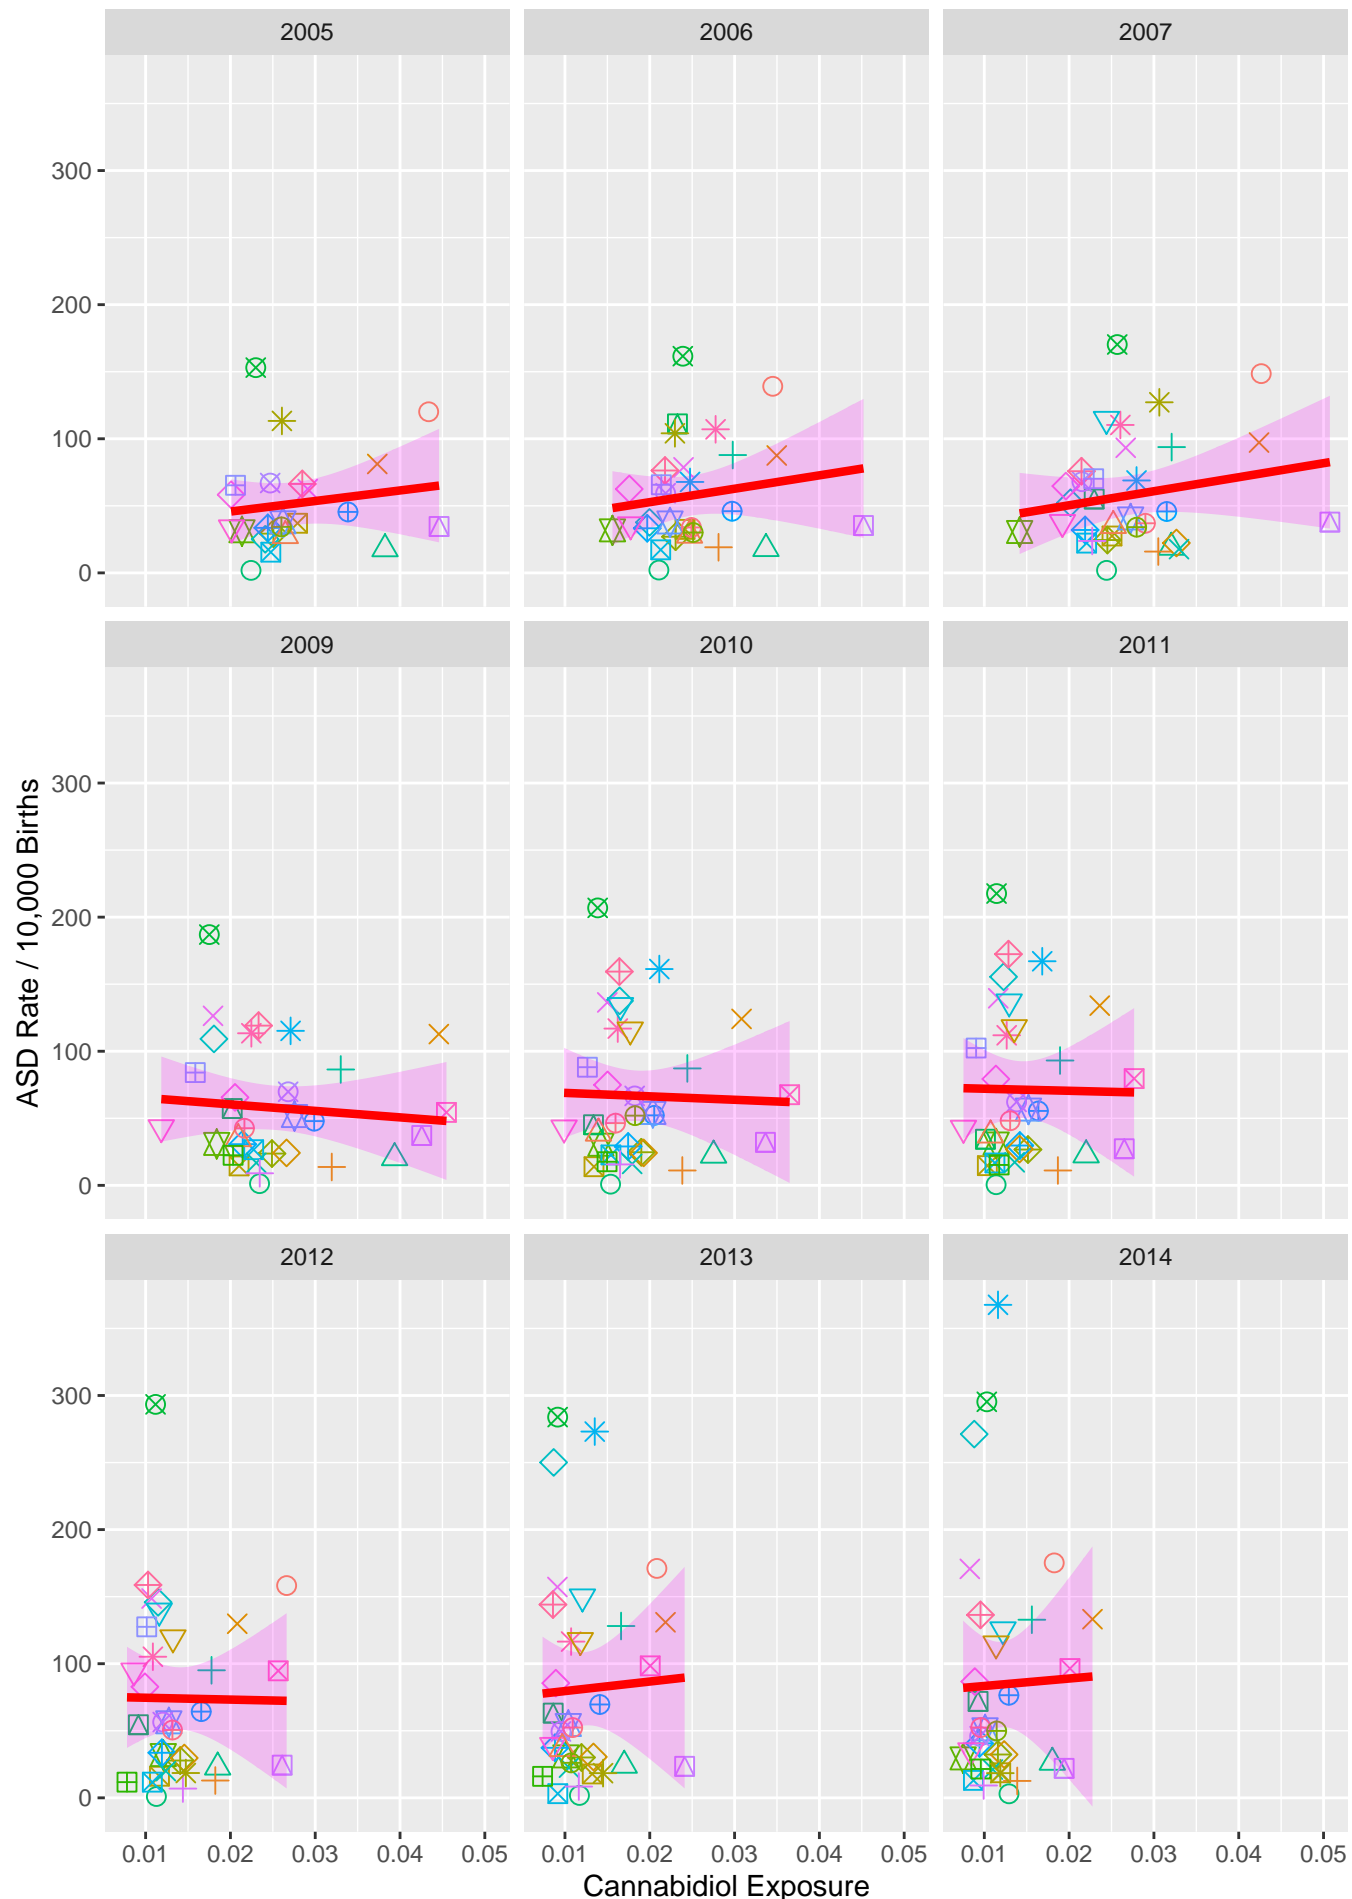

- USA State**
- Alaska
  - Arkansas
  - California
  - Colorado
  - Delaware
  - Florida
  - Georgia
  - Hawaii
  - Illinois
  - Indiana
  - Iowa
  - Kansas
  - Kentucky
  - Louisiana
  - Maryland
  - Massachusetts
  - Michigan
  - Minnesota
  - Mississippi
  - Missouri
  - Nebraska
  - Nevada
  - New Jersey
  - New York
  - North Carolina
  - North Dakota
  - Oklahoma
  - Rhode Island
  - South Carolina
  - Tennessee
  - Texas
  - Utah
  - Vermont
  - Virginia
  - West Virginia
  - Wisconsin
