# Supplementary material for: Contemporary epidemiology of rising atrial septal defect trends across USA 1991–2016: a combined ecological geospatiotemporal and causal inferential study
Source: Springer Nature journal article supplement (doi:10.1186/s12887-020-02431-z), 2020-11-30
Supplement: MOESM8 [file 18641836]

**ASD Rate by State by Racial Prevalence – Stratified**

**ASD Rate by State by Racial Prevalence – Unified**

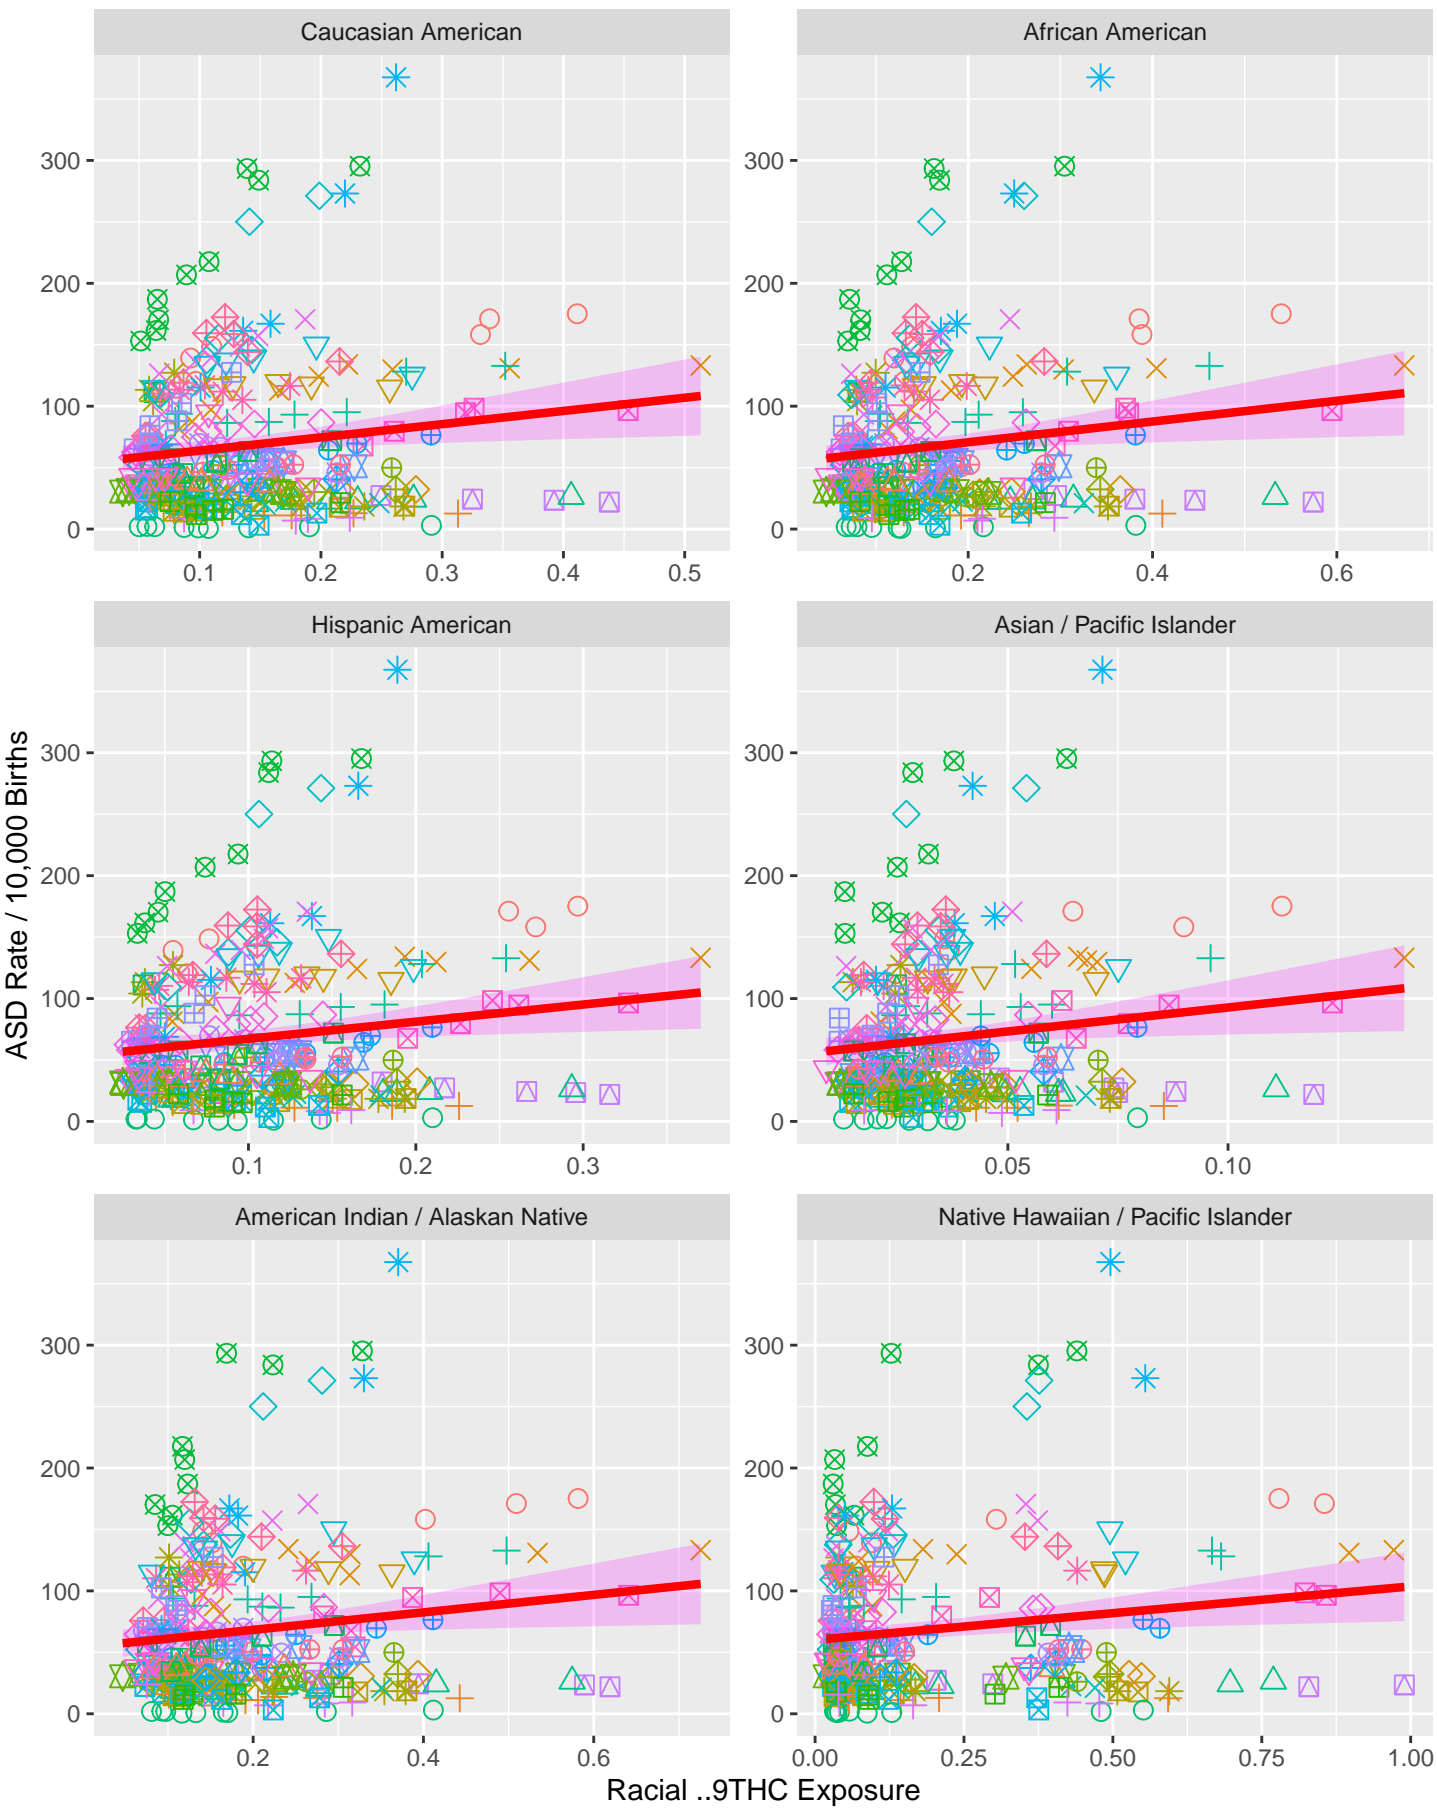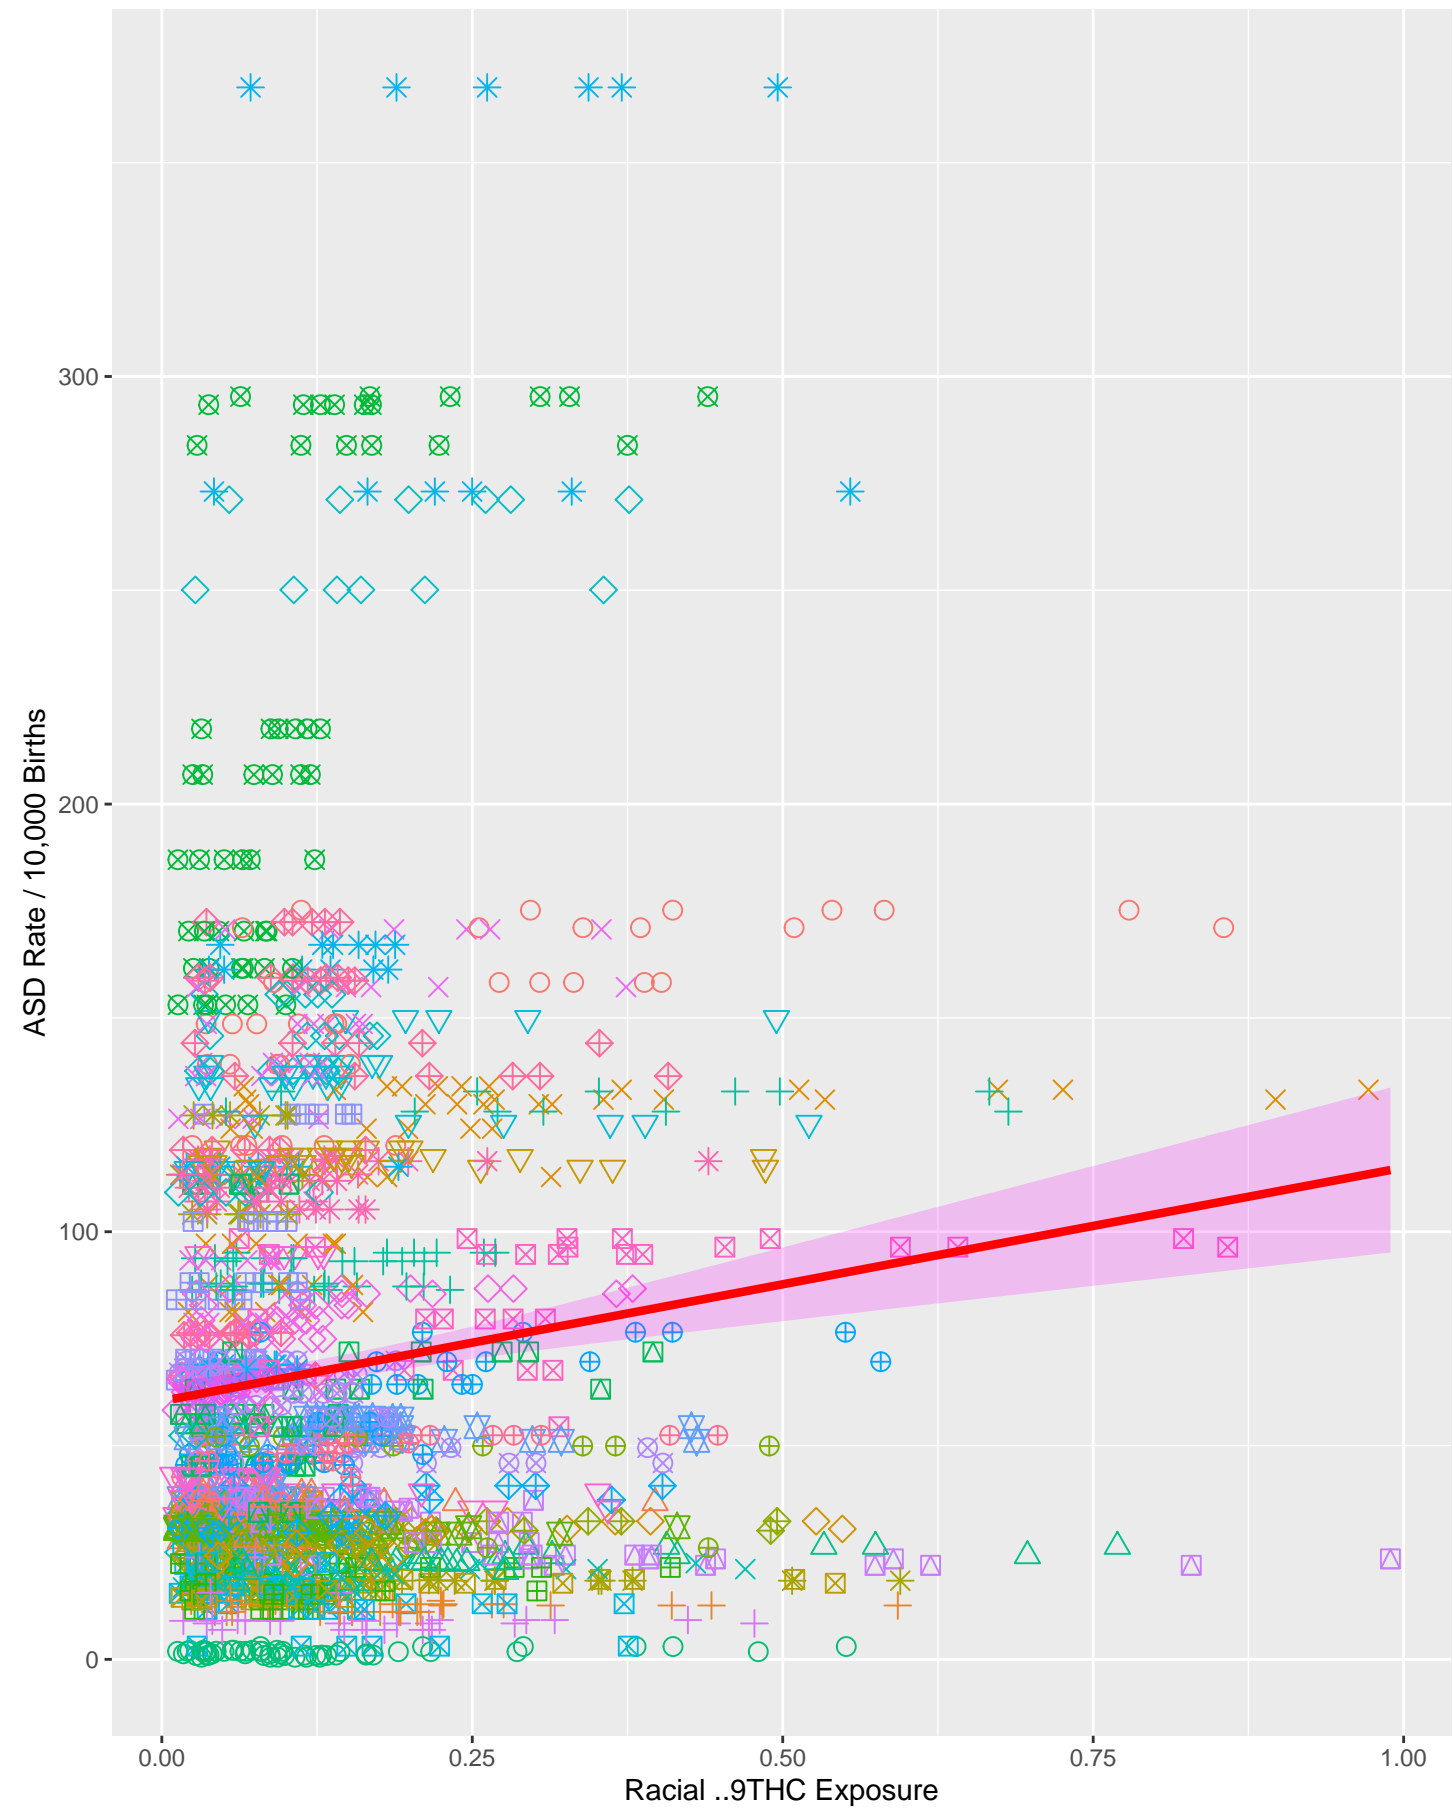

- USA State**
- Alaska
  - △ Arkansas
  - + California
  - × Colorado
  - ◇ Delaware
  - ▽ Florida
  - ⊠ Georgia
  - \* Hawaii
  - ⊕ Indiana
  - ⊗ Iowa
  - ⊞ Kansas
  - ⊠ Louisiana
  - Maryland
  - △ Massachusetts
  - + Michigan
  - × Minnesota
  - ◇ Mississippi
  - ▽ Missouri
  - ⊠ Nebraska
  - \* Nevada
  - ⊕ New Jersey
  - ⊕ New York
  - ⊠ North Carolina
  - ⊞ North Dakota
  - ⊠ Oklahoma
  - ▽ Rhode Island
  - + South Carolina
  - × Tennessee
  - ◇ Texas
  - ▽ Utah
  - ⊠ Vermont
  - \* Virginia
  - ◇ West Virginia
  - ⊕ Wisconsin
