# Supplementary material for: Contemporary epidemiology of rising atrial septal defect trends across USA 1991–2016: a combined ecological geospatiotemporal and causal inferential study
Source: Springer Nature journal article supplement (doi:10.1186/s12887-020-02431-z), 2020-11-30

**A**

Geospatial Interstate Links, USA (blue) and  
Additional Links After Eliding Hawaii and Alaska (Conceptually) (in red) - Queen Weights

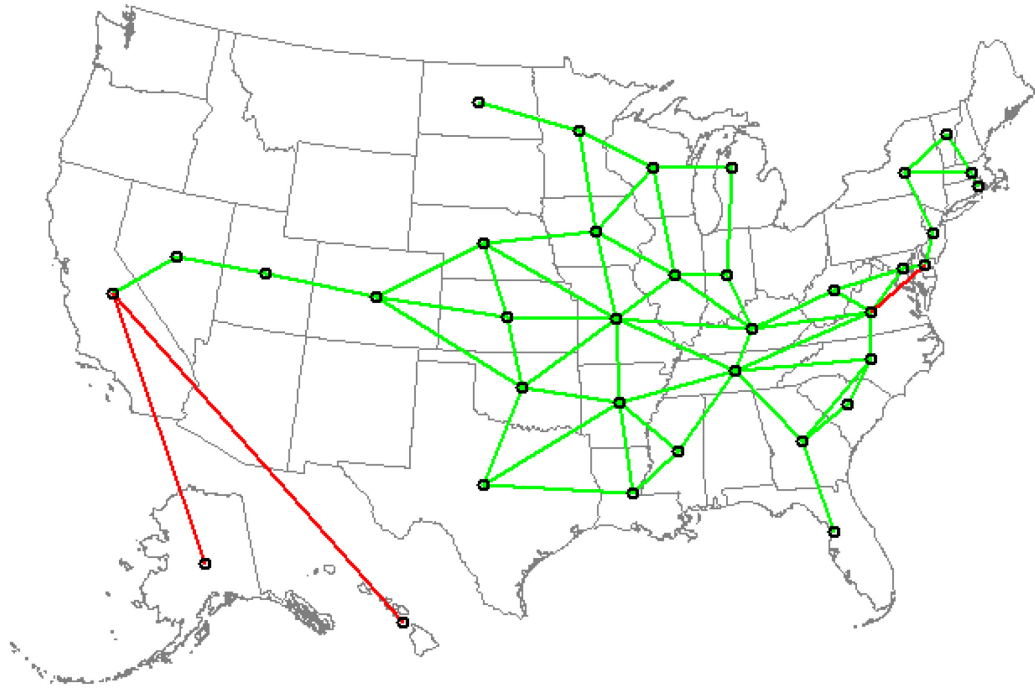**B**

Geospatial Interstate Links, - Queen Weights, USA

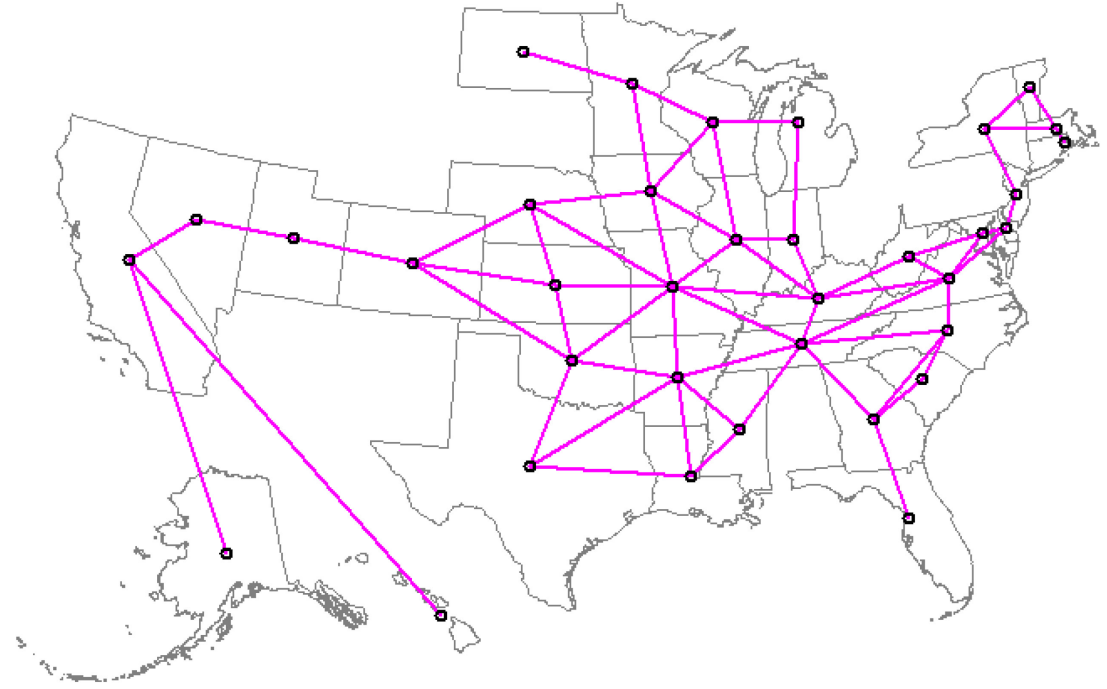

Supplement: MOESM11 [file 18641836]
